# Supplementary material for: Relationship Between Platelet Reactivity and Ischemic and Bleeding Events After Percutaneous Coronary Intervention in East Asian Patients: 1‐Year Results of the PENDULUM Registry
Source: PubMed Central journal article supplement — J Am Heart Assoc. 2020 May 12;9(10):e015439. doi: 10.1161/JAHA.119.015439 (PMC7660889; doi:10.1161/jaha.119.015439), 2020-05-12
Supplement: JAH3-9-e015439-s001.pdf [file JAH3-9-e015439-s001.pdf]

# **Supplemental Material**

## Appendix

### Study contributors

#### Study Administration Office

---

|                                       |                |
|---------------------------------------|----------------|
| Toho University Ohashi Medical Center | Raisuke Iijima |
|---------------------------------------|----------------|

#### Steering Committee

---

|                                      |                    |
|--------------------------------------|--------------------|
| Kurashiki Central Hospital           | Kazushige Kadota   |
| Saiseikai Kumamoto Hospital          | Koichi Nakao       |
| Fukuoka Sanno Hospital               | Hiroyoshi Yokoi    |
| Saiseikai Nakatsu Hospital           | Junya Shite        |
| Tenri Hospital                       | Yoshihisa Nakagawa |
| Teikyo University School of Medicine | Ken Kozuma         |
| Mitsui Memorial Hospital             | Kengo Tanabe       |

#### Advisory Board

---

|                                             |                  |
|---------------------------------------------|------------------|
| Shonan Kamakura General Hospital            | Shigeru Saito    |
| Nihon University School of Medicine         | Atsushi Hirayama |
| Kurume University Hospital                  | Takafumi Ueno    |
| Wakayama Medical University                 | Takashi Akasaka  |
| Kawasaki Medical School                     | Shiro Uemura     |
| Kobe University Graduate School of Medicine | Toshiro Shinke   |

#### Clinical Events Committee

---

##### Ischemic Events

|                                                  |                 |
|--------------------------------------------------|-----------------|
| Tokyo Medical University Hachioji Medical Center | Nobuhiro Tanaka |
|--------------------------------------------------|-----------------|

|                                         |                   |
|-----------------------------------------|-------------------|
| Nihon University School of Medicine     | Tadateru Takayama |
| Yokohama City University Medical Center | Kiyoshi Hibi      |
| Toranomon Hospital                      | Yuji Matsumaru    |

**Bleeding Events**

|                                                    |                   |
|----------------------------------------------------|-------------------|
| Juntendo University Graduate School of<br>Medicine | Katsumi Miyauchi  |
| Tokyo Medical University Hospital                  | Takashi Kawai     |
| Kyushu University                                  | Takanari Kitazono |

**Pharmacodynamics evaluation adviser**

---

|                         |                     |
|-------------------------|---------------------|
| Mie University Hospital | Masakatsu Nishikawa |
| Tohoku University       | Hisanori Horiuchi   |

**Statisticians**

---

|                 |                    |
|-----------------|--------------------|
| Toho University | Yoshitaka Murakami |
|-----------------|--------------------|

**Data Coordination**

---

|                         |                   |
|-------------------------|-------------------|
| Statistical Analysis    | Statcom CO., Ltd. |
| Data Management         | CMIC CO., Ltd.    |
| Electronic Data Capture | Meditrix CO., Ltd |

---

## Study Institutions and Investigators

| Institution                           | Investigator     |
|---------------------------------------|------------------|
| Toho University Ohashi Medical Center | Masato Nakamura  |
|                                       | Norihiro Kogame  |
|                                       | Raisuke Iijima   |
|                                       | Katsushi Amemiya |
| Wakayama Medical University           | Takashi Akasaka  |
|                                       | Takashi Kubo     |
|                                       | Yasushi Ino      |
| Kurume University Hospital            | Takafumi Ueno    |
|                                       | Masahiro Sasaki  |
| Kurashiki Central Hospital            | Kazushige Kadota |
|                                       | Shunsuke Kubo    |
| Teikyo University School of Medicine  | Hiroyuki Kyono   |
| Saiseikai Nakatsu Hospital            | Junya Shite      |
|                                       | Yoichi Kijima    |
| Kobe University Hospital              | Toshiro Shinke   |
|                                       | Natsuko Tahara   |
|                                       | Hiromasa Otake   |
|                                       | Shinsuke Nakano  |
| Mitsui Memorial Hospital              | Kengo Tanabe     |
| Saiseikai Kumamoto Hospital           | Tomohiro         |
|                                       | Sakamoto         |
|                                       | Shinzo Miyamoto  |
|                                       | Koichi Nakao     |
|                                       | Hiroto Suzuyama  |

Tenri Hospital

Yoshihisa

Nakagawa

Soichiro Enomoto

Shunsuke

Nishimura

Toshihiro Tamura

Juntendo University Hospital

Hiroshi Iwata

Fukuoka Sanno Hospital

Hiroyoshi Yokoi

Koji Ozaki

Yuji Murakami

Yokohama City University Medical Center

Kiyoshi Hibi

Nobuhiko Maejima

Nihon University Itabashi Hospital

Atsushi Hirayama

Daisuke Fukamachi

Tadateru Takayama

Yasuo Okumura

Fukui CardioVascular Center

Sumio Mizuno

Yosuke Takazawa

Kazuo Osato

Nagoya University Hospital

Toyoaki Murohara

Hideki Ishii

Susumu Suzuki

Akihito Tanaka

Naoki Iwakawa

Hiroshi Tashiro

Tokyo Kamata Hospital

Naoto Inoue

Tokyo Women's Medical University Hospital

Nobuhisa Hagiwara

|                                                               |                    |
|---------------------------------------------------------------|--------------------|
|                                                               | Hisao Otsuki       |
|                                                               | Junichi Yamaguchi  |
| University of Occupational and Environmental Health,<br>Japan | Shinjo Sonoda      |
|                                                               | Hironori Takami    |
|                                                               | Akiyoshi Shimizu   |
|                                                               | Toshiya Miura      |
| Ageo Central General Hospital                                 | Takaaki Isshiki    |
|                                                               | Naoki Masuda       |
| Edogawa Hospital                                              | Hiroshi Ohira      |
| Tokyo Metropolitan Tama Medical Center                        | Hiroyuki Tanaka    |
|                                                               | Yuya Mitsuhashi    |
| St. Luke's International Hospital                             | Nobuyuki<br>Komiya |
| Sakakibara Heart Institute                                    | Tetsuya Tobaru     |
|                                                               | Tomofumi Tanaka    |
|                                                               | Itaru Takamisawa   |
| Showa University Northern Yokohama Hospital                   | Seitaro Ebara      |
| Juntendo University Shizuoka Hospital                         | Satoru Suwa        |
| Nagoya Kyoritsu Hospital                                      | Daisuke Kamoi      |
|                                                               | Takashi Sakakibara |
|                                                               | Norio Umemoto      |
| Matsusaka Central Hospital                                    | Takashi Tanigawa   |
| Sakurabashi Watanabe Hospital                                 | Kenshi Fujii       |
| Kobe City Medical Center General Hospital                     | Yutaka Furukawa    |
|                                                               | Natsuhiko Ehara    |
| The Jikei University Hospital                                 | Takayuki Ogawa     |

|                                                         |                   |
|---------------------------------------------------------|-------------------|
|                                                         | Kazuo Ogawa       |
|                                                         | Yasunori Inoue    |
| Odawara Cardiovascular Hospital                         | Itaru Yokouchi    |
|                                                         | Satoru Toi        |
|                                                         | Kenji Yamazaki    |
| Tokushima University Hospital                           | Tetsuzo Wakatsuki |
|                                                         | Koji Yamaguchi    |
| Chikamori Hospital                                      | Kazuya Kawai      |
|                                                         | Satoshi Yamamoto  |
| Ota Memorial Hospital                                   | Hitoshi Anzai     |
|                                                         | Yoshinori         |
|                                                         | Nagashima         |
| Tokyo Medical University Hospital                       | Jun Yamashita     |
| Tokyo Women's Medical University Yachiyo Medical Center | Shoji Haruta      |
|                                                         | Honda Atsushi     |
|                                                         | Yasutaka Imamura  |
|                                                         | Toru Isoda        |
|                                                         | Katsuya Suzuki    |
| Ogikubo Hospital                                        | Yasuhiro Ishii    |
|                                                         | Masato Otsuka     |
| Saiseikai Kawaguchi General Hospital                    | Atsushi Takagi    |
|                                                         | Yutaka Terajima   |
| Rinku General Medical Center                            | Yoshihiro Takeda  |
| Kawasaki Medical School Hospital                        | Shiro Uemura      |
|                                                         | Teruyoshi Kume    |
| Shin-Koga Hospital                                      | Tomohiro          |
|                                                         | Kawasaki          |

|                                                  |                   |
|--------------------------------------------------|-------------------|
| Tokyo Medical University Hachioji Medical Center | Nobuhiro Tanaka   |
| Sakurakai Takahashi Hospital                     | Akihiko Takahashi |
| Osaka National Hospital                          | Yasunori Ueda     |
|                                                  | Kensuke Yokoi     |
| Osaka University Hospital                        | Yasushi Sakata    |
|                                                  | Masaki Awata      |
|                                                  | Takashi Kitao     |
|                                                  | Isamu Mizote      |
|                                                  | Tatsuya Shiraki   |
| Miyazaki Medical Association Hospital            | Yoshisato Shibata |
|                                                  | Nehiro Kuriyama   |
| Hyogo Prefectural Awaji Medical Center           | Takatoshi Hayashi |
|                                                  | Takumi Inoue      |
| Kansai Rosai Hospital                            | Takayuki Ishihara |
| Tokyo Rosai Hospital                             | Takashi Yoshitama |
|                                                  | Yuuji Yamashita   |
| Fujisawa City Hospital                           | Kengo Tsukahara   |
|                                                  | Kei Nishikawa     |
|                                                  | Takayuki          |
|                                                  | Mitsuhashi        |
| Yokohama City University Hospital                | Teruyasu Sugano   |
|                                                  | Masayoshi         |
|                                                  | Kiyokuni          |
|                                                  | Naohiro Komura    |
|                                                  | Naoki Nakayama    |
|                                                  | Kiwamu Iwata      |
| Funabashi Municipal Medical Center               | Shigeru Fukuzawa  |



|                                        |                   |
|----------------------------------------|-------------------|
| Dokkyo Medical University Hospital     | Masashi Sakuma    |
| Hyogo Brain and Heart Center           | Yoshinori Yasaka  |
|                                        | Takahiro Sawada   |
| Yokohama Sakae Kyosai Hospital         | Ichiro Michishita |
|                                        | Taku Iwaki        |
| Tokushima Red Cross Hospital           | Koichi Kishi      |
| Ogaki Municipal Hospital               | Yasuhiro Morita   |
| Japanese Red Cross Okayama Hospital    | Tetsuya Sato      |
|                                        | Soichiro Fuke     |
| Asahi General Hospital                 | Junji Kanda       |
| Tokushima Prefectural Central Hospital | Hiroyuki Fujinaga |
|                                        | Hirofumi          |
|                                        | Yamamoto          |
| Saiseikai Utsunomiya Hospital          | Takashi Yagi      |
|                                        | Koji Ueno         |
| Showa University Hospital              | Hiroaki Tsujita   |
| Hiroshima Prefectural Hospital         | Hironori Ueda     |
| Fujita Health University Hospital      | Yukio Ozaki       |
|                                        | Masanori Okumura  |
| Shiga General Hospital                 | Masaharu Okada    |
| Osaka Police Hospital                  | Yoshiharu Higuchi |
|                                        | Shimpei Nakatani  |

---

## Study institutes

| Institute                                               | Number of patients |
|---------------------------------------------------------|--------------------|
| Kurashiki Central Hospital                              | 349                |
| Toho University Ohashi Medical Center                   | 282                |
| Sakurakai Takahashi Hospital                            | 265                |
| Asahi General Hospital                                  | 253                |
| Ota Memorial Hospital                                   | 218                |
| Miyazaki Medical Association Hospital                   | 202                |
| Ogikubo Hospital                                        | 202                |
| Hyogo Brain and Heart Center                            | 157                |
| Kawasaki Medical School                                 | 153                |
| Sakakibara Heart Institute                              | 150                |
| Rinku General Medical Center                            | 146                |
| Tokyo Women's Medical University                        | 146                |
| Kansai Rosai Hospital Cardiovascular Center             | 143                |
| Tokyo Medical University Hachioji Medical Center        | 143                |
| Juntendo University Shizuoka Hospital                   | 139                |
| Chikamori Hospital                                      | 130                |
| Tokyo Women's Medical University Yachiyo Medical Center | 124                |
| Ageo Central General Hospital                           | 115                |
| Tokyo Kamata Hospital                                   | 114                |
| Fujisawa City Hospital                                  | 108                |
| Tokushima Prefectural Central Hospital                  | 102                |
| Hiroshima Prefectural Hospital                          | 100                |
| Saiseikai Utsunomiya Hospital                           | 100                |

|                                                                    |     |
|--------------------------------------------------------------------|-----|
| Sakurabashi Watanabe Hospital                                      | 100 |
| Shin-Koga Hospital                                                 | 100 |
| Tokushima Red Cross Hospital                                       | 100 |
| Tokushima University Hospital                                      | 100 |
| Wakayama Medical University                                        | 100 |
| Showa University School of Medicine                                | 97  |
| Yokohama City University Medical Center                            | 97  |
| Japanese Red Cross Okayama Hospital                                | 92  |
| National Hospital Organization Osaka National Hospital             | 89  |
| Mitsui Memorial Hospital                                           | 88  |
| Edogawa Hospital                                                   | 86  |
| Funabashi Municipal Medical Center Heart and Vascular<br>Institute | 86  |
| Nihon University School of Medicine                                | 82  |
| Kurume University Hospital                                         | 75  |
| Osaka Police Hospital                                              | 74  |
| Showa University Northern Yokohama Hospital                        | 74  |
| Shiga General Hospital                                             | 73  |
| Fukui Cardiovascular Center                                        | 71  |
| Tenri Hospital                                                     | 71  |
| Saiseikai Nakatsu Hospital                                         | 64  |
| Tokyo Rosai Hospital                                               | 63  |
| Matsusaka Central Hospital                                         | 56  |
| Kobe City Medical Center General Hospital                          | 54  |
| Yokohama Sakae Kyosai Hospital                                     | 53  |
| Tokyo Medical University                                           | 52  |
| Fukuoka Sanno Hospital                                             | 51  |

|                                                     |    |
|-----------------------------------------------------|----|
| Saiseikai Kawaguchi General Hospital                | 50 |
| Tokyo Metropolitan Tama Medical Center              | 45 |
| Fujita Health University Hospital                   | 44 |
| Nagoya University Graduate School of Medicine       | 43 |
| Hyogo Prefectural Awaji Medical Center              | 41 |
| University of Occupational and Environmental Health | 39 |
| Ogaki Municipal Hospital                            | 36 |
| The Jikei University School of Medicine             | 35 |
| Saiseikai Kumamoto Hospital                         | 30 |
| St. Luke's International Hospital                   | 29 |
| Kobe University Graduate School of Medicine         | 28 |
| Odawara Cardiovascular Hospital                     | 28 |
| Dokkyo Medical University                           | 25 |
| Nagoya Kyoritsu Hospital                            | 15 |
| Teikyo University School of Medicine                | 14 |
| Yokohama City University Hospital                   | 14 |
| Osaka University Graduate School of Medicine        | 13 |
| Juntendo University Graduate School of Medicine     | 4  |

## Data S1. Definitions used in this study

### Definition of the efficacy events

#### (1) Death

All deaths from any cause.

All-cause death: All deaths are applicable regardless of the cause.

Cardiovascular death: Deaths resulting from damage to the cardiac vessels.

#### (2) Non-fatal myocardial infarction

Non-fatal myocardial infarction is defined as myocardial infarction that is nonfatal based on diagnosis by markers for cardiomyopathy (cardiac enzymes) or electrocardiogram\* etc. in the presence of symptoms suggestive of a new onset of acute myocardial infarction or reinfarction after index percutaneous coronary intervention (PCI) or coronary artery bypass graft surgery (CABG).

\*An ST change of  $\geq \pm 1$  mm (0.1 mV) (new onset or recurrence) or a new Q wave abnormality is observed.

#### (3) Non-fatal stroke

A patient has cerebral stroke when neurologic symptoms or signs newly develop and when the culprit lesion is detected by computed tomography (CT) or magnetic resonance imaging (MRI) scans. Cerebral stroke is divided into two major subtypes:

ischemic stroke (cerebral infarction) and nonischemic stroke (e.g., cerebral hemorrhage, subarachnoid hemorrhage).

Ischemic stroke (cerebral infarction): A new onset of neurological signs or symptoms with a new infarct lesion related to the neurological signs or symptoms, which is confirmed by CT or MRI scans, regardless of whether the neurological signs or symptoms last at least 24 hours or not.

Nonischemic stroke: Cerebral hemorrhage, subarachnoid hemorrhage, etc.

#### (4) Revascularization

Revascularization is defined as unscheduled (emergent) PCI, CABG, or intracoronary thrombolysis introduced after index PCI or CABG.

- Target Lesion Revascularization

Repeat PCI or CABG for the target lesion (proximal and distal 5-mm-long segments from the edge of the implanted stent) due to restenosis of the target lesion or other complications.

- Target Vessel Revascularization

Repeat PCI or CABG for the target vessel due to restenosis of the target vessel or other complications.

#### (5) Transient ischemic attack (TIA)

TIA is defined as transient episodes of neurologic dysfunction caused by focal cerebral, spinal cord, and retinal ischemia. CT and MRI scans reveal no evidence of acute infarction.

(6) Stent thrombosis

Stent thrombosis is defined as definite, probable, or possible stent thrombosis by the Academic Research Consortium classification.

(7) Peripheral arterial occlusive disease

Peripheral arterial occlusive disease internally or surgically treated due to acute ischemia

**Table S1.** Study criteria

| Inclusion criteria                                                                                                                                                                                                                                                                                                                                                                                                                                                                                                                                                                                                                                                                            |
|-----------------------------------------------------------------------------------------------------------------------------------------------------------------------------------------------------------------------------------------------------------------------------------------------------------------------------------------------------------------------------------------------------------------------------------------------------------------------------------------------------------------------------------------------------------------------------------------------------------------------------------------------------------------------------------------------|
| <p>Patients who met all the following criteria were included in this study:</p> <ol style="list-style-type: none"><li>1. Patients aged <math>\geq 20</math> years when consent was obtained</li><li>2. Patients with coronary artery lesions that were visually confirmed by coronary angiography and for which PCI was indicated by drug-eluting stent placement (as judged with reference to the package insert)</li><li>3. Patients administered antiplatelet drugs</li><li>4. Patients providing written consent after receiving an explanation of the contents of this clinical research (in case of an emergency, consent could be obtained from a designated representative)</li></ol> |
| Exclusion criteria                                                                                                                                                                                                                                                                                                                                                                                                                                                                                                                                                                                                                                                                            |
| <p>Patients who were participating or planning to participate in a clinical study that consisted of a clinical trial or intervention before the follow-up of this study was complete.</p>                                                                                                                                                                                                                                                                                                                                                                                                                                                                                                     |

Patients who had acute coronary syndrome or coronary artery disease requiring elective intracoronary stenting and who had undergone PCI with DES implantation were eligible for the study. DES = drug-eluting stent, PCI = percutaneous coronary intervention.



**Table S2.** One-year cumulative incidence of primary and secondary endpoints

|                                    | Number of events | Incidence (%) |
|------------------------------------|------------------|---------------|
| MACCE                              | 261              | 4.4           |
| All cause death                    | 156              | 2.7           |
| Non-fatal myocardial infarction    | 62               | 1.0           |
| Non-fatal stroke                   | 51               | 0.9           |
| Stent thrombosis                   | 17               | 0.3           |
| Major bleeding (BARC type 3 and 5) | 165              | 2.8           |
| All bleedings                      | 419              | 7.1           |

BARC = Bleeding Academic Research Consortium; MACCE = major adverse cardiac and cerebrovascular events.

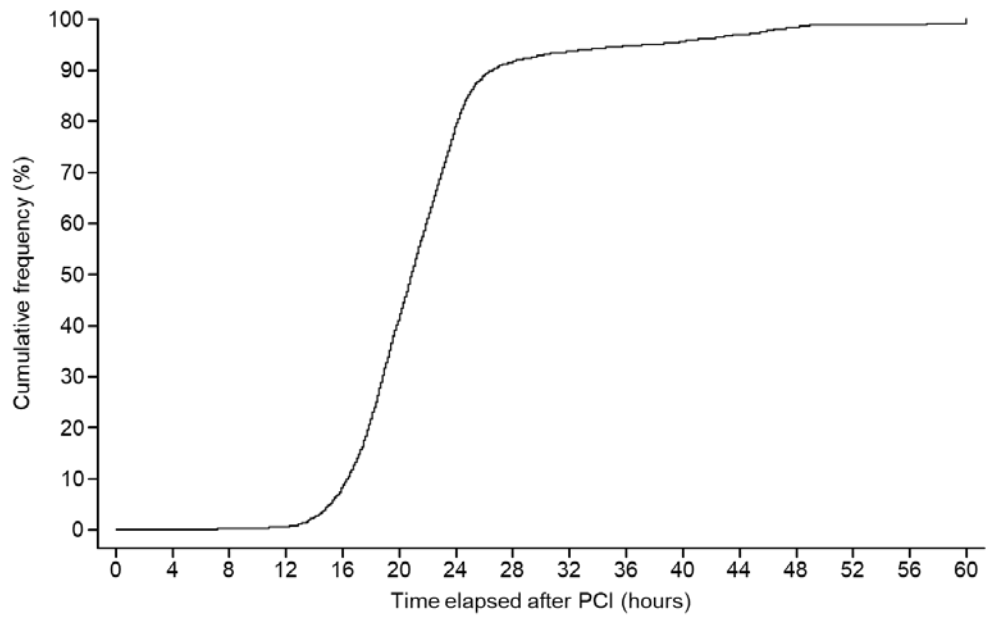

**Figure S1.** Time to measurement of PRU 12–48 h after PCI

PCI = percutaneous coronary intervention; PRU = P2Y<sub>12</sub> reaction units.

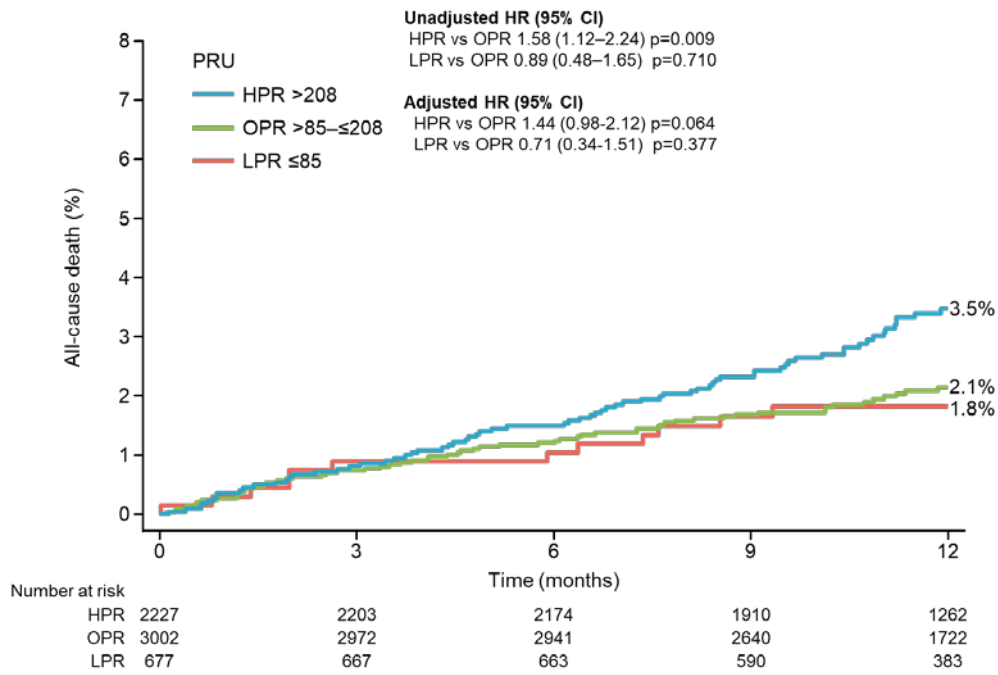

**Figure S2A.** Time-to-event curves through 1 year for all-cause death according to platelet reactivity

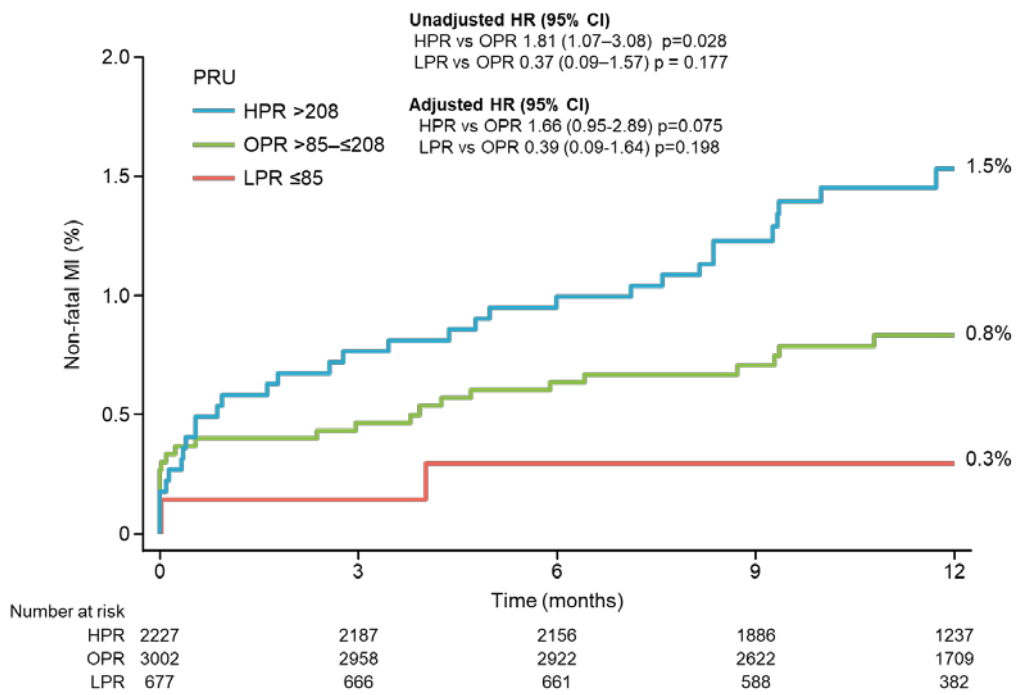

**Figure S2B.** Time-to-event curves through 1 year for non-fatal MI according to platelet reactivity

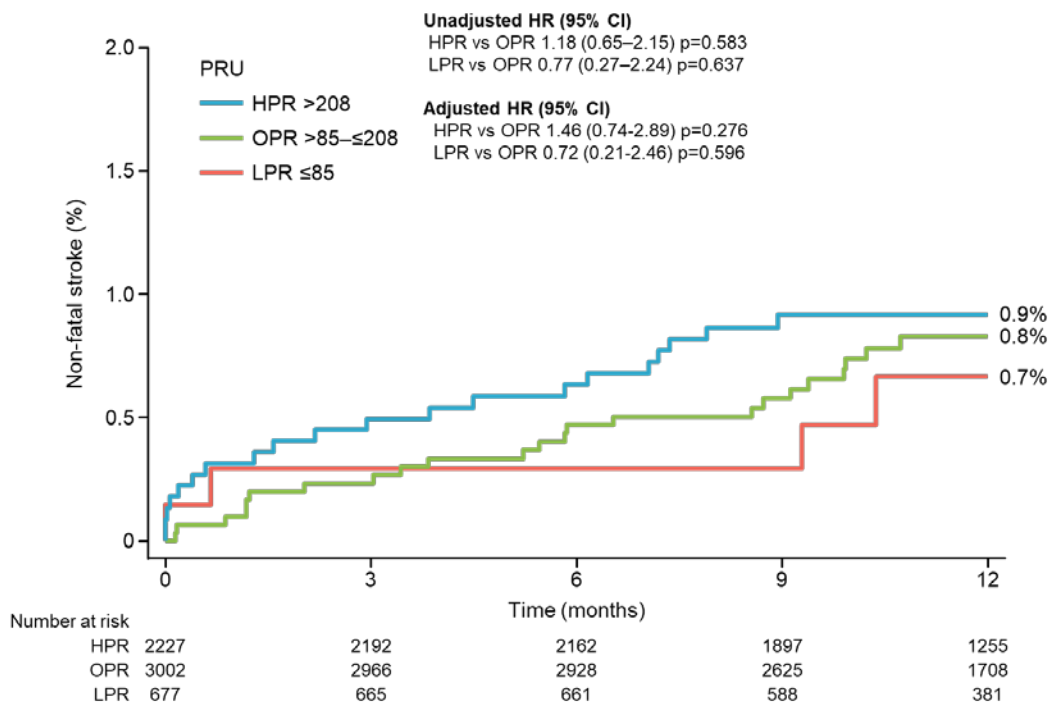

**Figure S2C.** Time-to-event curves through 1 year for non-fatal stroke according to platelet reactivity

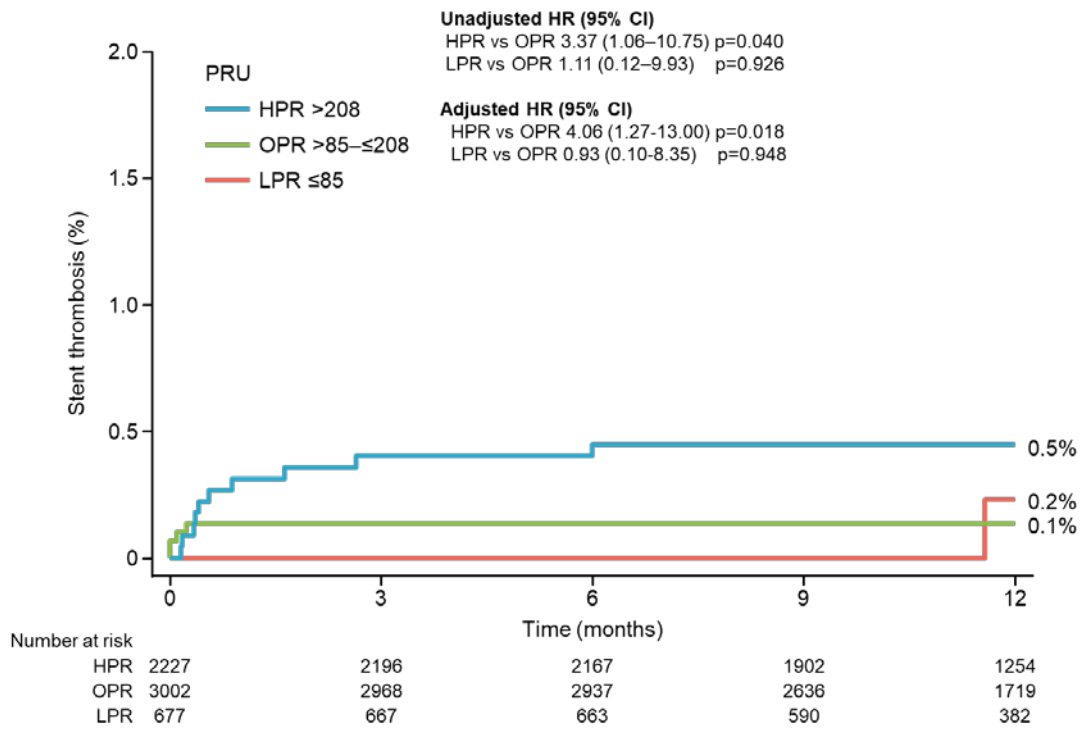

**Figure S2D.** Time-to-event curves through 1 year for stent thrombosis according to platelet reactivity

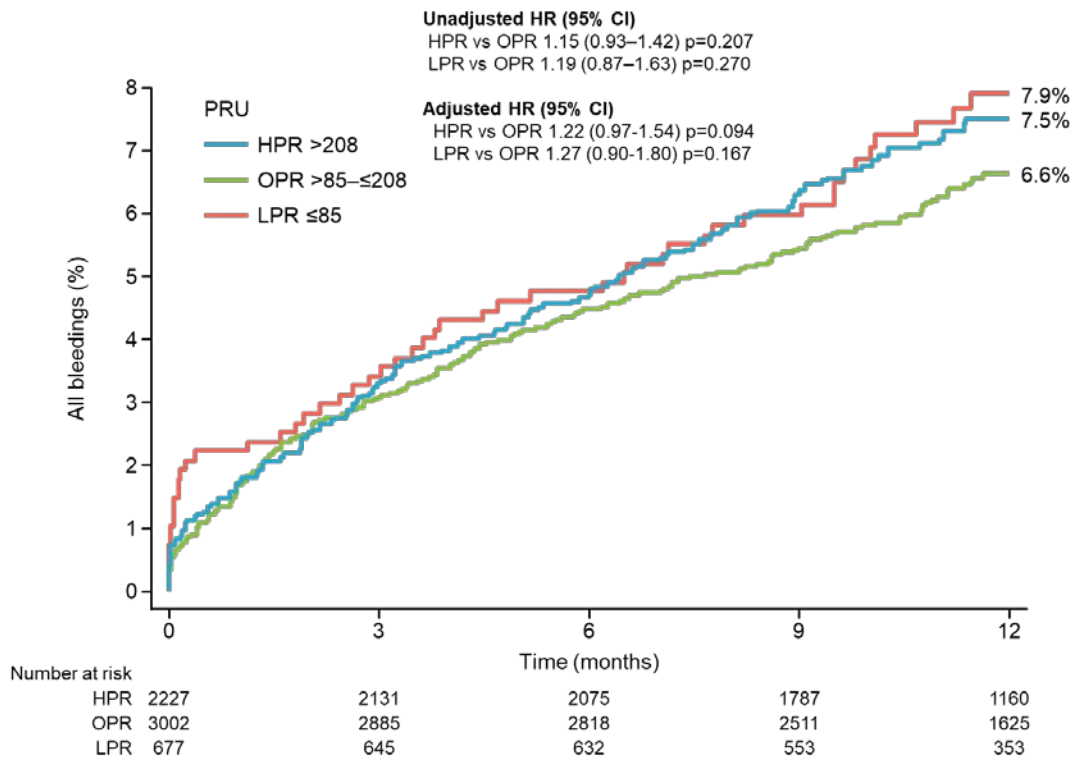

**Figure S2E.** Time-to-event curves through 1 year for all bleeding according to platelet reactivity

HPR = high P2Y<sub>12</sub> reaction units; LPR = low P2Y<sub>12</sub> reaction units; MI = myocardial infarction; OPR = optimal P2Y<sub>12</sub> reaction units; PRU = P2Y<sub>12</sub> reaction units.

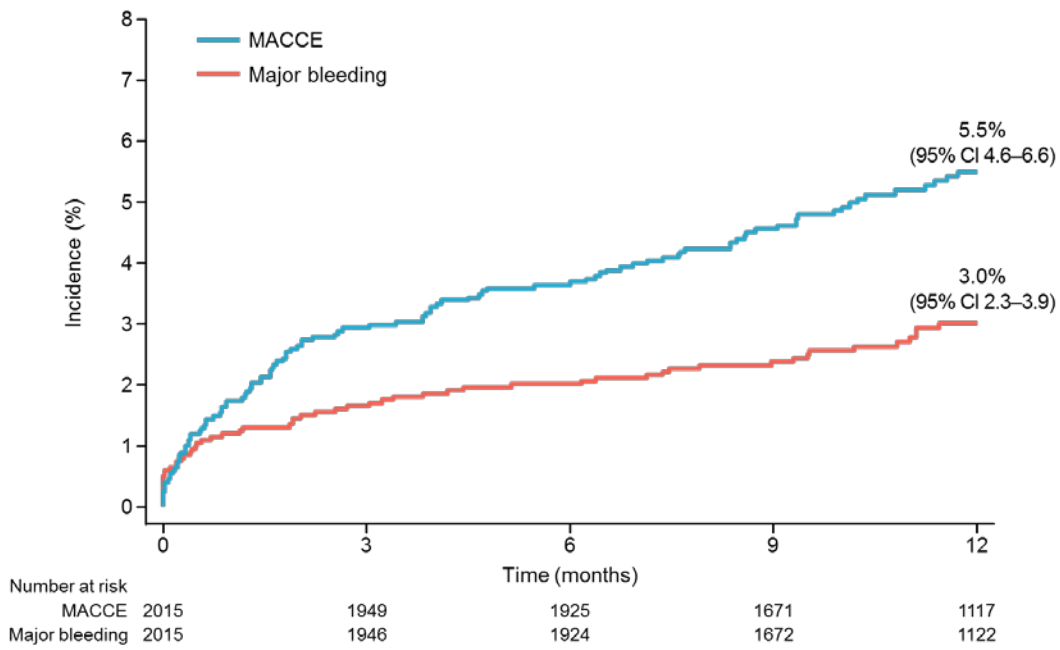

**Figure S3A.** Time to event curves of ACS and non-ACS groups through 1 year (ACS patients)



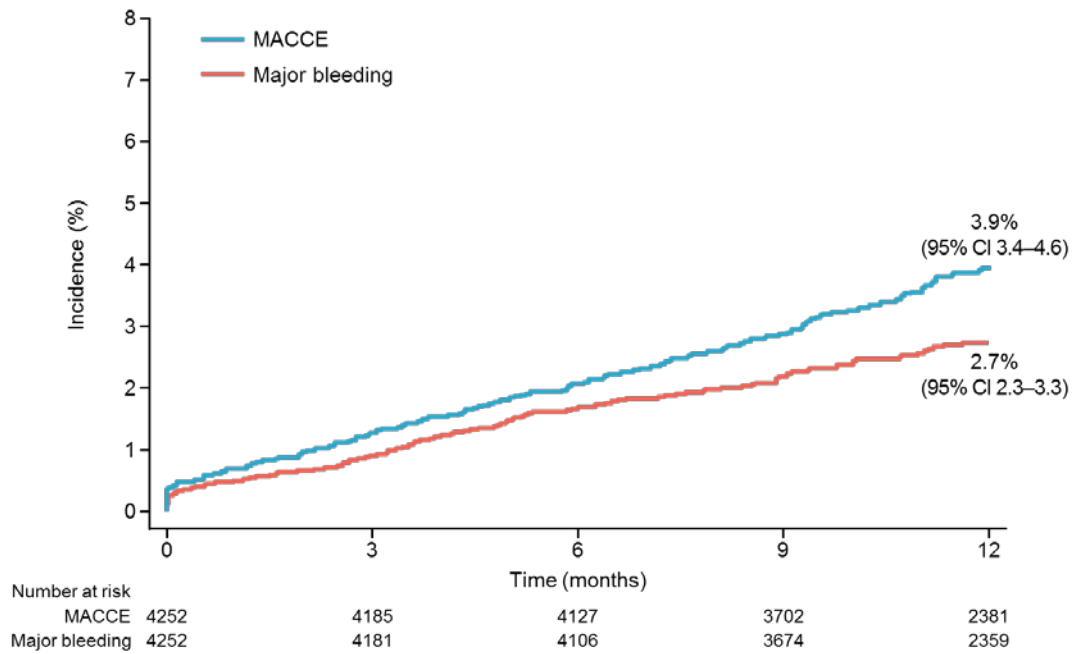

**Figure S3B.** Time to event curves of ACS and non-ACS groups through 1 year (non-ACS patients)

ACS = acute coronary syndrome; CI = confidence interval; MACCE = major adverse cardiac and cerebrovascular events.

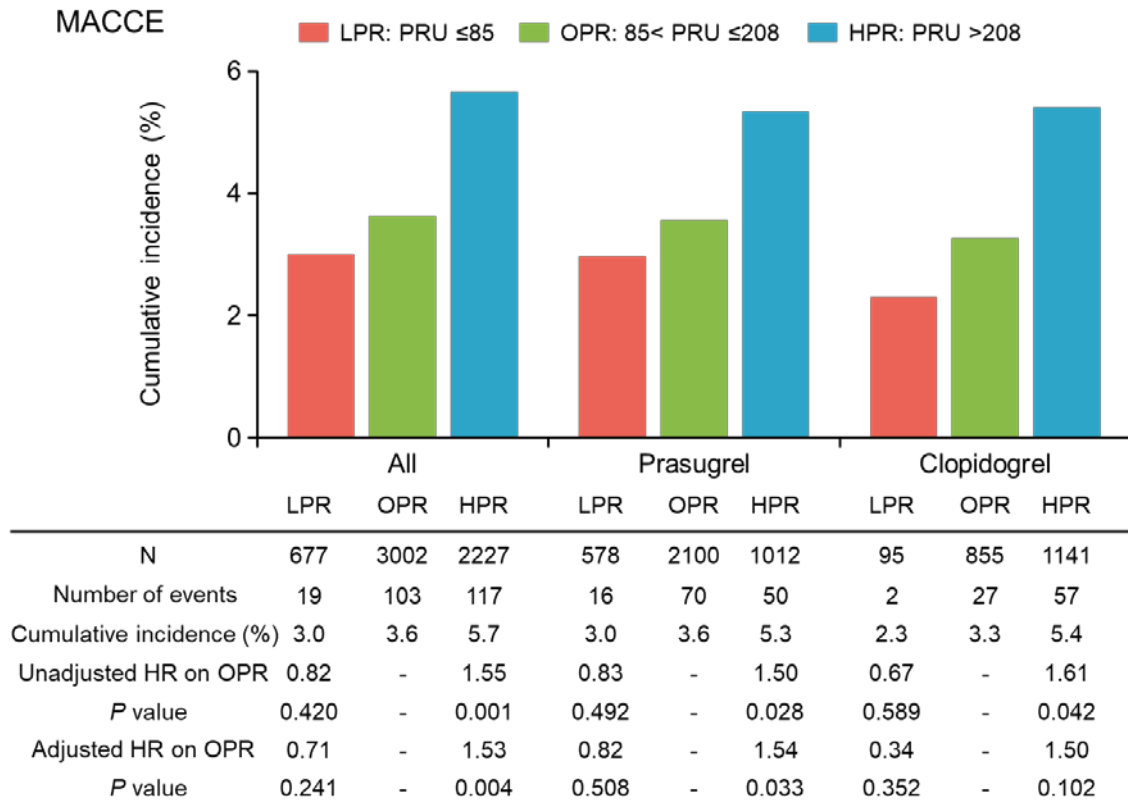

**Figure S4A.** One-year cumulative incidence of MACCE according to platelet reactivity by P2Y12 inhibitor at discharge

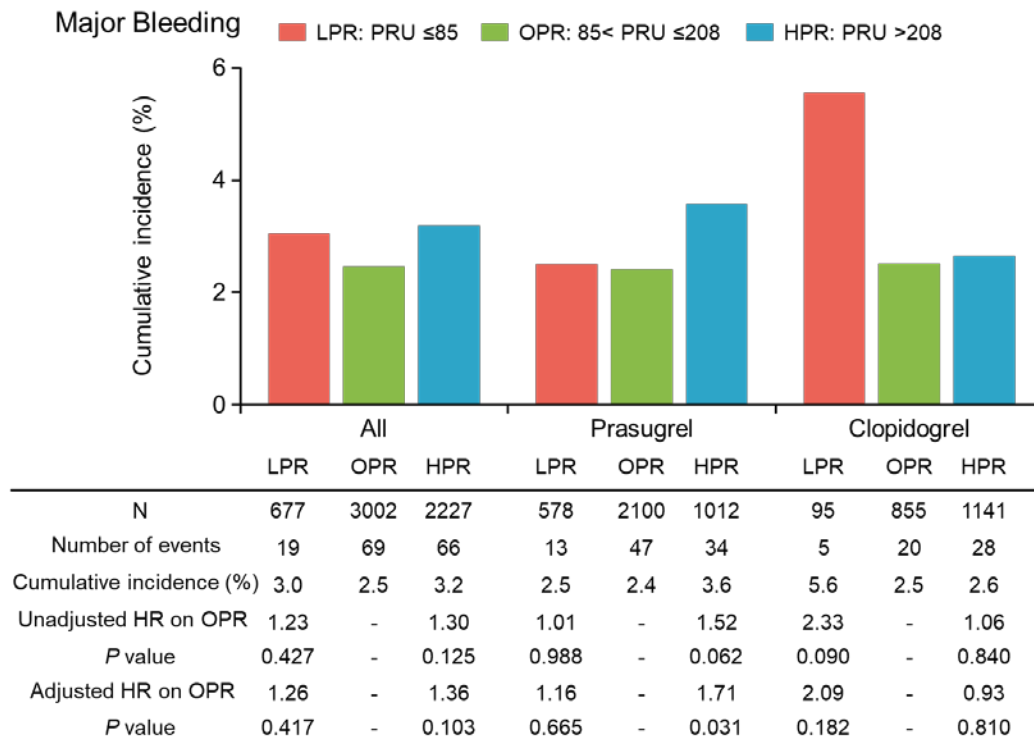

**Figure S4B.** One-year cumulative incidence of major bleeding according to platelet reactivity by P2Y<sub>12</sub> inhibitor at discharge

HPR = high P2Y<sub>12</sub> reaction units; HR = hazard ratio; LPR = low P2Y<sub>12</sub> reaction units;

MACCE = major adverse cardiac and cerebrovascular events; OPR = optimal P2Y<sub>12</sub>

reaction units; PRU = P2Y<sub>12</sub> reaction units.
